# Supplementary material for: In Vivo Generation of BK and JC Polyomavirus Defective Viral Genomes in Human Urine Samples Associated with Higher Viral Loads
Source: PubMed Central journal article supplement (PMC8316075; doi:10.1128/jvi.00250-21), 2021-05-24
Supplement: jvi.00250-21-s0001.pdf [file jvi.00250-21-s0001.pdf]

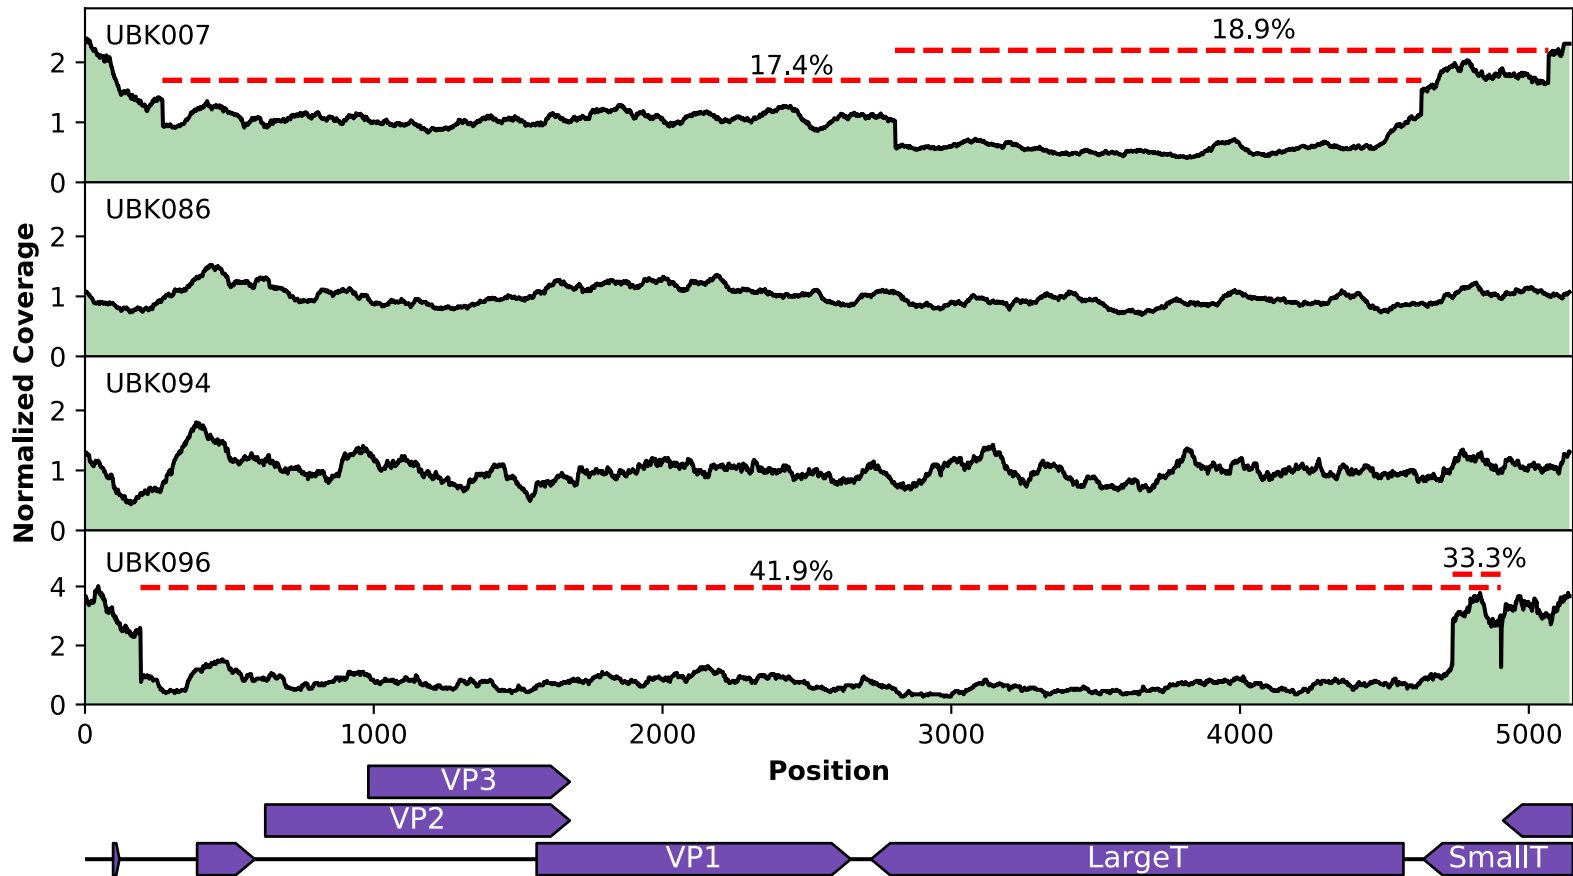

**Figure S1.** Coverage maps of two DVG-containing BKPvV strains, UBK007 and UBK096, and two DVG-negative BKPvV strains, UBK086 and UBK094, using KAPA HyperPlus library preparation kit as an alternative to the NexteraXT library preparation demonstrate reproducibility of the DVGs are not an artefact of a particular library preparation method. Coverage maps were generated in the same fashion as Figure 2.

**Table S1A/B/C.** Sample, sequencing, and ddPCR metadata for BKPyV or JCPyV positive samples.

| Sample | BK virus Copies/mL | Total Reads | Reads on BK | % Reads on BK | Max Coverage | Mean Coverage | Reads containing DVGs | Cumulative DVG Depth as % of Max Depth |
|--------|--------------------|-------------|-------------|---------------|--------------|---------------|-----------------------|----------------------------------------|
| UBK007 | 8.40E+08           | 149501      | 77257       | 51.68         | 3692         | 1857          | 2425                  | 65.68                                  |
| UBK024 | 6.60E+08           | 192119      | 70517       | 36.7          | 2187         | 1521          | 1887                  | 86.28                                  |
| UBK029 | 2.60E+07           | 649561      | 142394      | 21.92         | 12263        | 5134          | 193                   | 1.57                                   |
| UBK034 | 3.60E+08           | 39253       | 30694       | 78.2          | 1250         | 953           | 30                    | 2.4                                    |
| UBK035 | 3.20E+08           | 160315      | 64747       | 40.39         | 5025         | 2225          | 466                   | 9.27                                   |
| UBK040 | 6.60E+07           | 454964      | 537         | 0.12          | 46           | 16            | 0                     | 0                                      |
| UBK054 | 2.50E+08           | 3734        | 1866        | 49.97         | 138          | 85            | 0                     | 0                                      |
| UBK062 | 1.50E+08           | 960280      | 264702      | 27.57         | 14747        | 6844          | 11948                 | 81.02                                  |
| UBK064 | 1.20E+08           | 55991       | 5872        | 10.49         | 602          | 193           | 0                     | 0                                      |
| UBK076 | 2.30E+08           | 259367      | 7021        | 2.71          | 577          | 209           | 0                     | 0                                      |
| UBK077 | 1.10E+06           | 356077      | 4558        | 1.28          | 917          | 166           | 24                    | 2.62                                   |
| UBK086 | 4.20E+09           | 206655      | 109447      | 52.96         | 4112         | 2703          | 0                     | 0                                      |
| UBK088 | 1.10E+08           | 161221      | 4806        | 2.98          | 602          | 157           | 553                   | 91.86                                  |
| UBK094 | 6.50E+08           | 189166      | 15495       | 8.19          | 632          | 491           | 0                     | 0                                      |
| UBK096 | 1.20E+09           | 96163       | 9507        | 9.89          | 972          | 258           | 926                   | 95.27                                  |
| UBK121 | 2.00E+08           | 227510      | 126173      | 55.46         | 10835        | 4226          | 25328                 | 233.76                                 |
| UBK122 | 3.90E+08           | 110338      | 52240       | 47.35         | 1648         | 1255          | 115                   | 6.98                                   |
| UBK140 | 1.40E+07           | 82523       | 63431       | 76.86         | 4297         | 2357          | 91                    | 2.12                                   |
| UBK143 | 2.30E+08           | 146479      | 81843       | 55.87         | 4760         | 2997          | 0                     | 0                                      |
| UBK146 | 7.20E+07           | 235888      | 2899        | 1.23          | 319          | 95            | 0                     | 0                                      |
| UBK161 | 3.90E+07           | 113331      | 81336       | 71.77         | 5342         | 2975          | 1982                  | 37.1                                   |
| UBK174 | 2.10E+07           | 214644      | 75314       | 35.09         | 6220         | 2803          | 29                    | 0.47                                   |
| UBK177 | 2.60E+08           | 172963      | 102536      | 59.28         | 8457         | 3404          | 109                   | 1.29                                   |
| UBK178 | 2.30E+07           | 183899      | 131535      | 71.53         | 10060        | 4987          | 3556                  | 35.35                                  |
| UBK187 | 6.20E+07           | 219958      | 4068        | 1.85          | 272          | 104           | 0                     | 0                                      |
| UBK245 | 1.10E+08           | 310124      | 19406       | 6.26          | 1331         | 656           | 0                     | 0                                      |
| UBK263 | 8.00E+08           | 27104       | 22201       | 81.91         | 1300         | 768           | 0                     | 0                                      |
| UBK264 | 3.90E+08           | 306055      | 2786        | 0.91          | 199          | 79            | 26                    | 13.07                                  |
| UBK265 | 6.10E+08           | 364638      | 165870      | 45.49         | 10124        | 5307          | 2111                  | 20.85                                  |
| UBK266 | 4.60E+10           | 36444       | 28420       | 77.98         | 2442         | 1346          | 547                   | 22.4                                   |
| UBK272 | 1.40E+08           | 342581      | 20328       | 5.93          | 1416         | 585           | 0                     | 0                                      |
| UBK279 | 8.90E+07           | 214168      | 134377      | 62.74         | 6054         | 4106          | 23                    | 0.38                                   |
| UBK280 | 8.90E+07           | 9608        | 5333        | 55.51         | 1053         | 180           | 0                     | 0                                      |
| UBK282 | 8.60E+07           | 106983      | 70023       | 65.45         | 7257         | 2127          | 9203                  | 126.82                                 |
| UBK289 | 5.80E+08           | 129976      | 1798        | 1.38          | 218          | 55            | 0                     | 0                                      |
| UBK292 | 5.30E+09           | 268089      | 70544       | 26.31         | 7643         | 2525          | 192                   | 2.51                                   |
| UBK294 | 2.50E+09           | 200066      | 124375      | 62.17         | 10216        | 3781          | 526                   | 5.15                                   |
| UBK295 | 4.40E+09           | 135271      | 118151      | 87.34         | 13363        | 3625          | 74                    | 0.55                                   |

| Sample | BK virus Copies/mL | Total Reads | Reads on JC | % Reads on JC | JCPyV Max Coverage | JCPyV Mean Coverage | Reads containing JCPyV DVGs | % Reads with JC DVGs over Max Coverage |
|--------|--------------------|-------------|-------------|---------------|--------------------|---------------------|-----------------------------|----------------------------------------|
| UBK016 | 6.30E+04           | 1085885     | 79159       | 7.29          | 5159               | 2946                | 95                          | 1.84                                   |
| UBK028 | 1.50E+05           | 519556      | 13668       | 2.63          | 567                | 237.5               | 0                           | 0                                      |
| UBK077 | 1.10E+06           | 356077      | 16444       | 4.62          | 1271               | 614.1               | 76                          | 5.98                                   |
| UBK090 | 6.80E+05           | 370671      | 10237       | 2.76          | 644                | 323.1               | 0                           | 0                                      |
| UBK091 | 7.30E+04           | 1380762     | 1118        | 0.08          | 64                 | 29.7                | 0                           | 0                                      |
| UBK183 | 2.60E+05           | 85548       | 2237        | 2.61          | 197                | 83.1                | 0                           | 0                                      |
| UBK289 | 5.80E+08           | 129976      | 635         | 0.49          | 84                 | 19.5                | 0                           | 0                                      |
| UBK292 | 5.30E+09           | 268089      | 26843       | 10.01         | 4069               | 904                 | 1915                        | 47.06                                  |
| UBK295 | 4.40E+09           | 135271      | 31392       | 23.21         | 8077               | 1032.6              | 0                           | 0                                      |
| UJC004 | -                  | 10294197    | 933077      | 9.06          | 60870              | 23951               | 0                           | 0                                      |
| UJC005 | -                  | 3764470     | 2254        | 0.06          | 230                | 60                  | 0                           | 0                                      |

| Sample | BK virus Copies/mL | VP1/Large T antigen ddPCR ratio | DVGs by Sequencing | DVGs by ddPCR |
|--------|--------------------|---------------------------------|--------------------|---------------|
| UBK007 | 8.40E+08           | 1.79                            | Yes                | Yes           |
| UBK010 | 1.90E+07           | 0.93                            |                    | No            |
| UBK012 | 2.60E+04           | 1.10                            |                    | No            |
| UBK016 | 6.30E+04           | 1.04                            |                    | No            |
| UBK018 | 3.50E+06           | 1.03                            |                    | No            |
| UBK024 | 6.60E+08           | 1.35                            | Yes                | Yes           |
| UBK028 | 1.50E+05           | 1.17                            |                    | No            |
| UBK029 | 2.60E+07           | 1.04                            | No                 | No            |
| UBK032 | 1.90E+05           | 1.08                            |                    | No            |
| UBK034 | 3.60E+08           | 0.96                            | No                 | No            |
| UBK035 | 3.20E+08           | 1.22                            | No                 | No            |
| UBK038 | 2.10E+06           | 1.00                            |                    | No            |
| UBK048 | 2.90E+04           | 1.06                            |                    | No            |
| UBK054 | 2.50E+08           | 1.14                            | No                 | No            |
| UBK060 | 7.50E+07           | 1.04                            |                    | No            |
| UBK062 | 1.50E+08           | 3.08                            | Yes                | Yes           |
| UBK064 | 1.20E+08           | 0.97                            | No                 | No            |
| UBK077 | 1.10E+06           | 0.97                            | No                 | No            |
| UBK082 | 2.30E+06           | 1.06                            |                    | No            |
| UBK088 | 1.10E+08           | 3.57                            | Yes                | Yes           |
| UBK091 | 7.30E+04           | 1.05                            |                    | No            |
| UBK094 | 6.50E+08           | 1.09                            | No                 | No            |
| UBK096 | 1.20E+09           | 1.37                            | Yes                | Yes           |
| UBK098 | 7.80E+04           | 1.08                            |                    | No            |
| UBK105 | 2.90E+04           | 1.00                            |                    | No            |
| UBK106 | 3.20E+06           | 0.95                            |                    | No            |
| UBK109 | 1.50E+05           | 1.00                            |                    | No            |
| UBK116 | 2.20E+04           | 0.92                            |                    | No            |
| UBK118 | 1.30E+07           | 1.00                            |                    | No            |
| UBK121 | 2.00E+08           | 1.37                            | Yes                | Yes           |
| UBK122 | 3.90E+08           | 1.04                            | No                 | No            |
| UBK123 | 4.10E+07           | 1.01                            |                    | No            |
| UBK124 | 1.80E+05           | 0.95                            |                    | No            |
| UBK132 | 2.10E+05           | 1.06                            |                    | No            |
| UBK134 | 4.80E+04           | 1.05                            |                    | No            |
| UBK138 | 7.10E+04           | 0.96                            |                    | No            |
| UBK139 | 5.30E+06           | 1.05                            |                    | No            |
| UBK140 | 1.40E+07           | 0.98                            | No                 | No            |
| UBK142 | 1.50E+06           | 0.99                            |                    | No            |

|        |          |      |     |     |
|--------|----------|------|-----|-----|
| UBK143 | 2.30E+08 | 0.98 | No  | No  |
| UBK146 | 7.20E+07 | 1.07 | No  | No  |
| UBK152 | 1.20E+05 | 1.09 |     | No  |
| UBK155 | 3.50E+04 | 0.89 |     | No  |
| UBK161 | 3.90E+07 | 1.26 | Yes | Yes |
| UBK163 | 8.30E+04 | 1.80 |     | Yes |
| UBK174 | 2.10E+07 | 0.91 | No  | No  |
| UBK177 | 2.60E+08 | 0.95 | No  | No  |
| UBK178 | 2.30E+07 | 1.30 | Yes | Yes |
| UBK183 | 2.60E+05 | 1.12 |     | No  |
| UBK187 | 6.20E+07 | 1.02 | No  | No  |
| UBK192 | 4.80E+04 | 0.93 |     | No  |
| UBK199 | 6.50E+04 | 1.00 |     | No  |
| UBK207 | 1.20E+05 | 1.07 |     | No  |
| UBK245 | 1.10E+08 | 0.93 | No  | No  |
| UBK262 | 1.00E+06 | 0.99 |     | No  |
| UBK263 | 8.00E+08 | 1.01 | No  | No  |
| UBK264 | 3.90E+08 | 1.25 | Yes | Yes |
| UBK265 | 6.10E+08 | 1.01 | Yes | No  |
| UBK266 | 4.60E+10 | 0.99 | Yes | No  |
| UBK272 | 1.40E+08 | 1.02 | No  | No  |
| UBK279 | 8.90E+07 | 1.19 | No  | No  |
| UBK282 | 8.60E+07 | 1.93 | Yes | Yes |
| UBK290 | 2.50E+09 | 0.82 |     | No  |
| UBK292 | 5.30E+09 | 1.31 | No  | Yes |
| UBK294 | 2.50E+09 | 1.01 | No  | No  |
| UBK295 | 4.40E+09 | 0.93 | No  | No  |

**Table S2.** RPM values of uropathogenic bacteria and fungi in 46 BKPyV- or JCPyV-positive samples. Uropathogenic bacteria were considered present when any bacterial species had greater than 10 RPM.

| Sample | <i>S.aureus</i> | <i>S. saprophyticus</i> | <i>Enterobacter</i> | <i>Citrobacter</i> | <i>Klebsiella</i> | <i>E.coli</i> | <i>P. aeruginosa</i> | <i>E. faecalis</i> | <i>E. faecium</i> | <i>P. stuartii</i> | <i>P. mirabilis</i> | <i>Candida</i> | Bacteria_Sum |
|--------|-----------------|-------------------------|---------------------|--------------------|-------------------|---------------|----------------------|--------------------|-------------------|--------------------|---------------------|----------------|--------------|
| UBK007 | 11              | 0                       | 0                   | 0                  | 0                 | 0             | 0                    | 0                  | 0                 | 0                  | 0                   | 0              | 11           |
| UBK016 | 0               | 0                       | 77                  | 68                 | 14                | 5             | 24                   | 0                  | 0                 | 0                  | 0                   | 0              | 188          |
| UBK024 | 0               | 0                       | 0                   | 0                  | 0                 | 0             | 0                    | 0                  | 0                 | 0                  | 0                   | 11             | 11           |
| UBK028 | 0               | 0                       | 0                   | 0                  | 0                 | 0             | 2                    | 4                  | 0                 | 0                  | 0                   | 15             | 22           |
| UBK029 | 0               | 0                       | 0                   | 0                  | 69                | 5             | 3                    | 2                  | 0                 | 0                  | 0                   | 0              | 79           |
| UBK034 | 29              | 29                      | 58                  | 0                  | 29                | 0             | 0                    | 0                  | 0                 | 0                  | 0                   | 29             | 173          |
| UBK035 | 0               | 0                       | 145                 | 0                  | 100               | 22            | 22                   | 0                  | 0                 | 0                  | 0                   | 11             | 301          |
| UBK040 | 18              | 0                       | 3                   | 0                  | 13                | 0             | 11                   | 0                  | 0                 | 3                  | 0                   | 45             | 92           |
| UBK054 | 0               | 0                       | 0                   | 0                  | 2904              | 953           | 67                   | 15192              | 119               | 0                  | 0                   | 0              | 19236        |
| UBK062 | 0               | 0                       | 0                   | 0                  | 148               | 295           | 295                  | 0                  | 0                 | 0                  | 0                   | 148            | 885          |
| UBK064 | 0               | 0                       | 2                   | 0                  | 5                 | 0             | 0                    | 0                  | 0                 | 0                  | 0                   | 0              | 7            |
| UBK076 | 0               | 10                      | 10                  | 0                  | 36                | 0             | 41                   | 7777               | 10                | 0                  | 0                   | 0              | 7886         |
| UBK077 | 0               | 0                       | 0                   | 8                  | 8                 | 348           | 8                    | 0                  | 0                 | 0                  | 0                   | 4              | 376          |
| UBK086 | 0               | 0                       | 0                   | 0                  | 0                 | 8             | 0                    | 0                  | 0                 | 0                  | 0                   | 0              | 8            |
| UBK088 | 0               | 0                       | 0                   | 0                  | 23                | 262           | 31                   | 0                  | 0                 | 0                  | 0                   | 0              | 316          |
| UBK090 | 5               | 0                       | 0                   | 5                  | 5                 | 5             | 0                    | 0                  | 0                 | 0                  | 0                   | 10             | 31           |
| UBK091 | 1               | 0                       | 0                   | 0                  | 0                 | 0             | 1                    | 0                  | 0                 | 0                  | 0                   | 2              | 4            |
| UBK094 | 0               | 6                       | 6                   | 30                 | 12                | 0             | 12                   | 0                  | 0                 | 0                  | 0                   | 6              | 73           |
| UBK096 | 46              | 0                       | 9                   | 0                  | 9                 | 28            | 46                   | 0                  | 0                 | 0                  | 0                   | 55             | 194          |
| UBK121 | 0               | 0                       | 0                   | 0                  | 185               | 5             | 0                    | 11                 | 0                 | 0                  | 0                   | 0              | 201          |
| UBK122 | 45              | 11                      | 0                   | 22                 | 206278            | 112           | 0                    | 22                 | 11                | 0                  | 0                   | 0              | 206502       |
| UBK140 | 0               | 0                       | 0                   | 0                  | 0                 | 349           | 0                    | 0                  | 0                 | 0                  | 0                   | 0              | 349          |
| UBK143 | 0               | 0                       | 0                   | 7                  | 0                 | 0             | 0                    | 0                  | 0                 | 0                  | 0                   | 0              | 7            |
| UBK146 | 0               | 0                       | 0                   | 0                  | 0                 | 5             | 0                    | 0                  | 0                 | 0                  | 0                   | 0              | 5            |
| UBK161 | 0               | 0                       | 0                   | 0                  | 0                 | 0             | 88                   | 0                  | 0                 | 0                  | 0                   | 0              | 88           |
| UBK174 | 0               | 0                       | 0                   | 0                  | 0                 | 0             | 1058                 | 5                  | 0                 | 0                  | 0                   | 0              | 1063         |
| UBK177 | 0               | 0                       | 0                   | 0                  | 12                | 0             | 6                    | 824                | 0                 | 0                  | 0                   | 0              | 843          |
| UBK178 | 0               | 6                       | 0                   | 30                 | 0                 | 304           | 480                  | 0                  | 0                 | 0                  | 0                   | 0              | 821          |
| UBK183 | 0               | 0                       | 14                  | 376                | 1431              | 463           | 0                    | 0                  | 0                 | 0                  | 0                   | 0              | 2284         |
| UBK187 | 6               | 0                       | 6                   | 0                  | 0                 | 0             | 0                    | 12                 | 0                 | 0                  | 0                   | 0              | 24           |
| UBK245 | 11              | 0                       | 0                   | 7                  | 0                 | 0             | 0                    | 18                 | 249               | 0                  | 0                   | 0              | 286          |
| UBK263 | 0               | 0                       | 42                  | 0                  | 0                 | 0             | 84                   | 0                  | 0                 | 0                  | 0                   | 84             | 211          |
| UBK264 | 0               | 0                       | 0                   | 0                  | 2                 | 5             | 1                    | 0                  | 1                 | 0                  | 1                   | 0              | 11           |
| UBK265 | 0               | 0                       | 0                   | 0                  | 0                 | 3             | 0                    | 0                  | 0                 | 0                  | 0                   | 0              | 3            |
| UBK266 | 0               | 0                       | 0                   | 0                  | 193               | 0             | 29                   | 0                  | 0                 | 0                  | 0                   | 0              | 222          |
| UBK272 | 0               | 0                       | 0                   | 22                 | 14                | 22            | 7                    | 51                 | 6220              | 0                  | 521                 | 0              | 6857         |
| UBK279 | 19              | 6                       | 25                  | 13                 | 57                | 13            | 76                   | 25                 | 6                 | 13                 | 0                   | 13             | 268          |
| UBK280 | 0               | 0                       | 0                   | 0                  | 0                 | 0             | 0                    | 0                  | 0                 | 0                  | 0                   | 0              | 0            |
| UBK282 | 0               | 0                       | 0                   | 0                  | 36                | 0             | 0                    | 0                  | 0                 | 0                  | 0                   | 0              | 36           |
| UBK289 | 0               | 0                       | 0                   | 0                  | 0                 | 0             | 0                    | 0                  | 0                 | 0                  | 0                   | 0              | 0            |
| UBK292 | 0               | 0                       | 4                   | 0                  | 570               | 13            | 0                    | 0                  | 0                 | 0                  | 0                   | 0              | 587          |
| UBK294 | 0               | 0                       | 0                   | 0                  | 0                 | 0             | 0                    | 0                  | 0                 | 0                  | 0                   | 0              | 0            |
| UBK295 | 0               | 0                       | 0                   | 0                  | 0                 | 0             | 0                    | 0                  | 0                 | 0                  | 0                   | 0              | 0            |
| UJC004 | 0               | 0                       | 0                   | 0                  | 1                 | 6             | 6                    | 0                  | 0                 | 0                  | 0                   | 0              | 13           |
| UJC005 | 0               | 0                       | 1                   | 0                  | 0                 | 43            | 0                    | 0                  | 0                 | 0                  | 0                   | 0              | 44           |
